# Supplementary material for: Investigation of vanadium(iii) and vanadium(iv) compounds supported by the linear diaminebis(phenolate) ligands: correlation between structures and magnetic properties
Source: Royal Society of Chemistry journal article supplement (doi:10.1039/d0dt04302h), 2021-01-01
Supplement: d0dt04302h1.pdf [file d0dt04302h1.pdf]

## Supporting Information

### Investigation of Vanadium(III) and Vanadium(IV) Compounds Supported by the Linear Diaminebis(aryloxo) Ligands. Correlation Between Structures and Magnetic Properties.

Zofia Janas,<sup>\*a</sup> Julia Jezierska,<sup>a</sup> Andrew Ozarowski,<sup>\*b</sup> Alina Bieńko,<sup>\*a</sup> Tadeusz Lis,<sup>a</sup> Adam Jezierski<sup>a</sup> and Marta Krawczyk<sup>c</sup>

<sup>a</sup> *Faculty of Chemistry, University of Wrocław, 14, F. Joliot-Curie, 50-383 Wrocław, Poland, e-mail: zofia.janas@chem.uni.wroc.pl*

<sup>b</sup> *National High Magnetic Field Laboratory, Florida State University, 1800 E. Paul Dirac Drive, Tallahassee, FL 32310 USA, e-mail: ozarowski@magnet.fsu.edu*

<sup>c</sup> *Faculty of Pharmacy, Wrocław Medical University, 211 Borowska, 50-556 Wrocław, Poland*

## Contents

**Figure S1.** Arrangement of molecules of **1** forming a chain stretching along [001] direction.

**Figure S2.** Packing diagram for **2**.

**Figure S3.** Fragment of parking diagram for **2** showing C–H··· $\pi$  intermolecular interactions.

**Figure S4.** The molecular structure of **3**.

**Figure S5.** Arrangement of molecules of **3** viewed down [010] direction.

**Figure S6.** Packing diagram presenting selected molecules of **4** arranged in layers parallel to the (010) plane.

**Figure S7.** The molecular structure of **5**·2CH<sub>3</sub>CN.

**Figure S8.** Arrangement of molecules of **5** viewed down [001] direction.

**Figure S9.** A chain of molecules of **5** held together by C–H··· $\pi$  interactions and hydrogen bonds.

**Figure S10.** Packing diagram for **6** viewed down [010] direction.

**Figure S11.** C–H··· $\pi$  interactions in **6**.

**Figure S12.** EPR frozen solution spectra (at 77 K) of compounds **3–7**

**Figure S13.** The  $\chi_M T$  vs T product after subtracting TIP from the experimental data.

**Figure S14.** Dihedral angle between the two V<sub>2</sub>O<sub>2</sub> planes for complexes **3–5**.

**Figure S15.** The HFEPR spectrum of **1**.

**Figure S16.** DC magnetic data for **1**, **2** and **6**, **7**. Left – ( ) □MT and (○) □M. Right – field dependence of the magnetization per formula unit. The solid lines are calculated using the PHI program.

**Table S1.** Crystal and structure refinement data for **1**, **2**·0.25CH<sub>3</sub>CN, **3**, **4**·2CH<sub>3</sub>CN, **5**·2CH<sub>3</sub>CN and **6**.

**Table S2.** Selected Bond Lengths (Å) and Angles (°) for **1** and **2**·0.25CH<sub>3</sub>CN.

**Table S3.** Selected Bond Lengths (Å) and Angles (°) for **3**, **4**·2CH<sub>3</sub>CN, **5**·2CH<sub>3</sub>CN and **6**.

**Table S4.** Geometry of the intermolecular hydrogen bonds in **2**.

**Table S5.** Geometry of C–H···π interactions in **2**.

**Table S6.** Geometry of the intermolecular hydrogen bonds in **1**.

**Table S7.** Geometry of C–H···π interactions in **1**.

**Table S8.** Geometry of C–H···π interactions in **3**.

**Table S9.** Geometry of intermolecular hydrogen bonds in **4**.

**Table S10.** Geometry of C–H···π interactions in **4**.

**Table S11.** Geometry of C–H···π interactions in **5**.

**Table S12.** Geometry of intermolecular hydrogen bonds in **5**.

**Table S13.** Geometry of π···π interactions in **6**.

**Table S14.** Geometry of C–H···π interactions in **6**.

**Table S1.** Crystal and structure refinement data for **1**, **2**·0.25CH<sub>3</sub>CN, **3**, **4**·2CH<sub>3</sub>CN, **5**·2CH<sub>3</sub>CN and **6**.

| symbol of the structure              | <b>1</b>                                                        | <b>2</b> ·0.25CH <sub>3</sub> CN                                                                    | <b>3</b>                                                                      | <b>4</b> ·2CH <sub>3</sub> CN                                                | <b>5</b> ·2CH <sub>3</sub> CN                                                                | <b>6</b>                                                        |
|--------------------------------------|-----------------------------------------------------------------|-----------------------------------------------------------------------------------------------------|-------------------------------------------------------------------------------|------------------------------------------------------------------------------|----------------------------------------------------------------------------------------------|-----------------------------------------------------------------|
| empirical formula                    | C <sub>25</sub> H <sub>33</sub> N <sub>2</sub> O <sub>4</sub> V | C <sub>27</sub> H <sub>37</sub> N <sub>2</sub> O <sub>4</sub> V·0.25C <sub>2</sub> H <sub>3</sub> N | C <sub>68</sub> H <sub>108</sub> N <sub>4</sub> O <sub>6</sub> V <sub>2</sub> | C <sub>44</sub> H <sub>58</sub> N <sub>6</sub> O <sub>6</sub> V <sub>2</sub> | C <sub>40</sub> H <sub>46</sub> Cl <sub>4</sub> N <sub>6</sub> O <sub>6</sub> V <sub>2</sub> | C <sub>22</sub> H <sub>30</sub> N <sub>2</sub> O <sub>3</sub> V |
| formula weight                       | 476.47                                                          | 514.79                                                                                              | 1179.46                                                                       | 868.84                                                                       | 950.51                                                                                       | 421.42                                                          |
| crystal size [mm <sup>3</sup> ]      | 0.49 x 0.23 x 0.06                                              | 0.60 x 0.13 x 0.06                                                                                  |                                                                               | 0.28x0.13x0.08                                                               | 0.18x0.27x0.43                                                                               | 0.60x0.53x0.40                                                  |
| crystal system                       | monoclinic                                                      | monoclinic                                                                                          | monoclinic                                                                    | monoclinic                                                                   | monoclinic                                                                                   | monoclinic                                                      |
| space group                          | <i>P</i> 2 <sub>1</sub> / <i>c</i>                              | <i>P</i> 2 <sub>1</sub> / <i>n</i>                                                                  | <i>P</i> 2 <sub>1</sub> / <i>n</i>                                            | <i>P</i> 2 <sub>1</sub> / <i>n</i>                                           | <i>P</i> 2 <sub>1</sub> / <i>n</i>                                                           | <i>P</i> 2 <sub>1</sub> / <i>n</i>                              |
| a [Å]                                | 12.011(3)                                                       | 13.237(3)                                                                                           | 20.300(9)                                                                     | 13.687(4)                                                                    | 13.557(4)                                                                                    | 13.376(5)                                                       |
| b [Å]                                | 14.728(3)                                                       | 15.650(4)                                                                                           | 8.107(2)                                                                      | 11.336(5)                                                                    | 11.269(3)                                                                                    | 11.010(3)                                                       |
| c [Å]                                | 13.307(3)                                                       | 25.711(7)                                                                                           | 22.043(10)                                                                    | 13.947(4)                                                                    | 13.829(5)                                                                                    | 15.427(6)                                                       |
| β [°]                                | 97.28(2)                                                        | 99.83(3)                                                                                            | 112.25(5)                                                                     | 94.91(3)                                                                     | 94.93(3)                                                                                     | 113.00(4)                                                       |
| V [Å <sup>3</sup> ]                  | 2335.0(9)                                                       | 5248(2)                                                                                             | 3358(3)                                                                       | 2156.0(13)                                                                   | 2104.9(11)                                                                                   | 2091.3(14)                                                      |
| Z                                    | 4                                                               | 8                                                                                                   | 2                                                                             | 2                                                                            | 2                                                                                            | 4                                                               |
| density (calcd) [g·m <sup>-3</sup> ] | 1.355                                                           | 1.303                                                                                               | 1.167                                                                         | 1.338                                                                        | 1.500                                                                                        | 1.338                                                           |
| F(000)                               | 1008                                                            | 2188                                                                                                | 1276                                                                          | 916                                                                          | 980                                                                                          | 892                                                             |
| coeff. μ [mm <sup>-1</sup> ]         | 0.459                                                           | 0.414                                                                                               | 0.329                                                                         | 0.487                                                                        | 0.752                                                                                        | 0.499                                                           |
| T [K]                                | 100(2)                                                          | 103(2)                                                                                              | 150(2)                                                                        | 125(2)                                                                       | 90(2)                                                                                        | 101(2)                                                          |
| λ [Å]                                | 0.71073                                                         | 0.71073                                                                                             | 0.71073                                                                       | 0.71073                                                                      | 0.71073                                                                                      | 0.71073                                                         |
| reflections coll.,<br>independ.      | 6668, 15428                                                     | 12638, 42392                                                                                        | 7341, 26589                                                                   | 6054, 12067                                                                  | 5777, 10198                                                                                  | 10167, 34826                                                    |
| R <sub>int</sub>                     | 0.028                                                           | 0.083                                                                                               | 0.12                                                                          | 0.097                                                                        | 0.12                                                                                         | 0.056                                                           |
| data/restraints/parameters           | 6668/0/295                                                      | 12638/0/651                                                                                         | 7341/0/389                                                                    | 6054/0/267                                                                   | 5777/0/265                                                                                   | 10167/0/259                                                     |
| final R indices                      | 0.039                                                           | 0.051                                                                                               | 0.074                                                                         | 0.057                                                                        | 0.046                                                                                        | 0.048                                                           |
| (I > 2σ(I))                          | 0.087                                                           | 0.113                                                                                               | 0.166                                                                         | 0.098                                                                        | 0.095                                                                                        | 0.138                                                           |
| final R <sub>1</sub> , wR (all data) | 0.055, 0.094                                                    | 0.089, 0.120                                                                                        | 0.125, 0.200                                                                  | 0.097, 0.112                                                                 | 0.071, 0.108                                                                                 | 0.055, 0.143                                                    |
| GOF on F <sup>2</sup>                | 1.021                                                           | 1.004                                                                                               | 1.038                                                                         | 1.032                                                                        | 1.026                                                                                        | 1.093                                                           |
| CCDC numbers                         | 1997038                                                         | 1997039                                                                                             | 1997040                                                                       | 1997041                                                                      | 1997042                                                                                      | 1997043                                                         |

**Table S2.** Selected Bond Lengths (Å) and Angles (°) for **2** and **2**·0.25CH<sub>3</sub>CN.

|         | <b>1</b>   | <b>2<sup>a</sup></b> | <b>2<sup>b</sup></b> |
|---------|------------|----------------------|----------------------|
| V–O1    | 1.9317(12) | 1.9314(18)           | 1.9425(17)           |
| V–O2    | 1.9263(12) | 1.9315(17)           | 1.9282(17)           |
| V–O3    | 2.0072(11) | 1.9717(17)           | 1.9945(17)           |
| V–O4    | 1.9817(11) | 2.0176(18)           | 1.9837(19)           |
| V–N1    | 2.2253(13) | 2.231(2)             | 2.189(2)             |
| V–N2    | 2.1850(13) | 2.173(2)             | 2.205(2)             |
| O2–V–O1 | 171.85(5)  | 171.09(7)            | 171.94(8)            |
| O2–V–O4 | 96.47(5)   | 87.49(7)             | 91.92(7)             |
| O1–V–O4 | 91.67(5)   | 91.20(8)             | 96.14(7)             |
| O2–V–O3 | 89.75(4)   | 97.67(7)             | 89.58(7)             |
| O1–V–O3 | 90.65(5)   | 91.14(7)             | 90.64(7)             |
| O4–V–O3 | 89.95(5)   | 89.85(7)             | 90.76(7)             |
| O2–V–N2 | 88.39(5)   | 87.59(8)             | 86.25(7)             |
| O1–V–N2 | 91.14(5)   | 94.06(8)             | 85.72(7)             |
| O4–V–N2 | 90.57(5)   | 174.41(8)            | 172.13(7)            |
| O3–V–N2 | 178.12(5)  | 88.19(7)             | 96.88(8)             |
| O2–V–N1 | 85.82(5)   | 86.53(7)             | 93.13(8)             |
| O1–V–N1 | 86.05(5)   | 85.06(7)             | 86.48(7)             |
| O4–V–N1 | 172.20(5)  | 100.84(7)            | 90.53(7)             |
| O3–V–N1 | 97.52(5)   | 168.71(8)            | 176.96(7)            |
| N2–V–N1 | 82.03(5)   | 81.49(8)             | 81.94(8)             |

**Table S3.** Selected Bond Lengths (Å) and Angles (°) for **3**, **4**·2CH<sub>3</sub>CN, **5**·2CH<sub>3</sub>CN and **6**.

|                    | <b>3</b>   | <b>4</b>   | <b>5</b>   | <b>6</b>   |
|--------------------|------------|------------|------------|------------|
| V1–O1              | 1.921(2)   | 1.9148(16) | 1.9268(16) | 1.8983(12) |
| V1–O2              | 1.607(2)   | 1.6115(19) | 1.6108(15) | 1.6025(9)  |
| V1–O3              | 2.017(2)   | 2.0174(16) | 2.0236(16) | 1.9219(10) |
| V1–O3              | 2.046(2)   | 2.0377(16) | 2.0476(16) | –          |
| V1–N1              | 2.225(3)   | 2.2166(19) | 2.210(2)   | 2.2003(9)  |
| V1–N2              | 2.440(3)   | 2.417(2)   | 2.3979(18) | 2.1672(9)  |
| V...V <sup>i</sup> | 3.2433(18) | 3.2488(12) | 3.2540(13) | –          |
| O2–V1–O1           | 104.06(11) | 103.77(8)  | 103.06(7)  | 113.00(5)  |
| O2–V1–O3           | 104.10(11) | 103.96(7)  | 103.68(7)  | 109.04(5)  |
| O1–V1–O3           | 88.13(10)  | 87.83(7)   | 88.21(7)   | 83.57(5)   |
| O1–V1–O3           | 154.85(9)  | 154.84(7)  | 155.90(6)  | –          |
| O3–V1–O3           | 74.11(10)  | 73.52(7)   | 73.88(7)   | –          |
| O2–V1–N1           | 87.36(12)  | 88.34(8)   | 88.34(7)   | 99.63(5)   |
| O1–V1–N1           | 89.44(11)  | 90.01(7)   | 90.06(7)   | 88.49(4)   |
| O3–V1–N1           | 168.53(9)  | 167.68(7)  | 167.94(6)  | 151.13(3)  |
| O3–V1–N1           | 104.41(10) | 104.58(7)  | 104.05(7)  | –          |
| O2–V1–N2           | 160.97(12) | 162.25(7)  | 163.02(7)  | 105.99(5)  |
| O1–V1–N2           | 84.31(10)  | 84.55(7)   | 84.77(6)   | 140.81(3)  |
| O3–V1–N2           | 93.10(10)  | 91.86(7)   | 91.48(6)   | 87.54(4)   |
| O3–V1–N2           | 79.14(10)  | 79.46(6)   | 79.81(6)   | –          |
| N1–V1–N2           | 75.51(10)  | 75.86(7)   | 76.48(6)   | 81.23(4)   |
| V1–O3–V1           | 105.89(10) | 106.48(7)  | 106.12(7)  | –          |

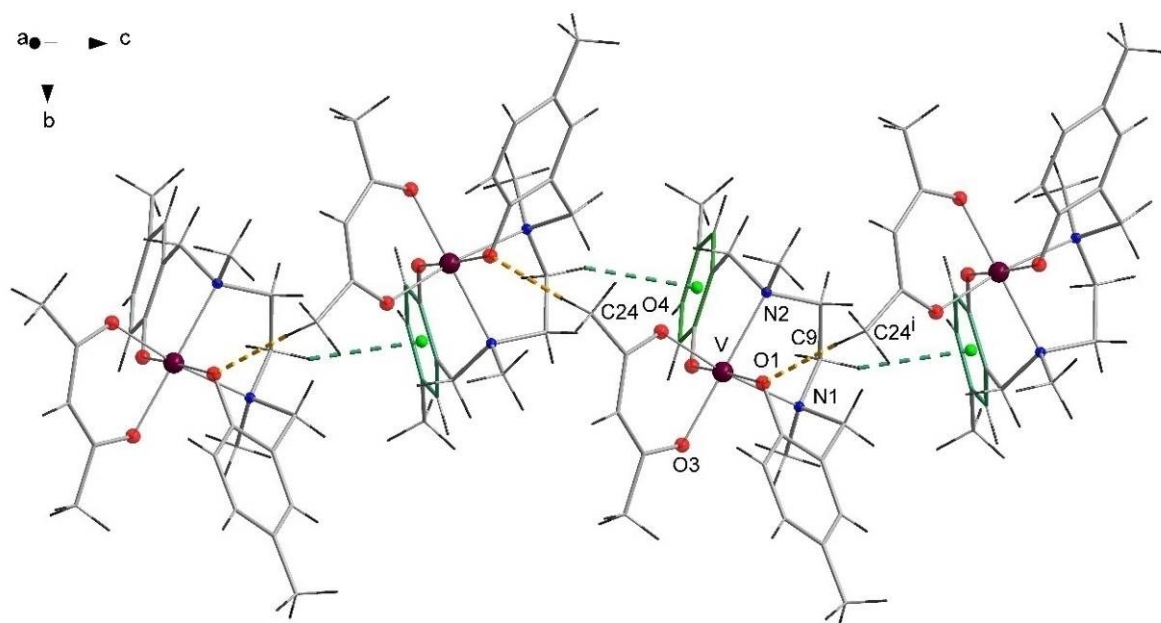

**Figure S1.** Arrangement of molecules **1** forming a chain stretching along [001] direction. C24–H24C $\cdots$ O1<sup>i</sup> hydrogen bonds are marked by yellow dashed lines. For C–H $\cdots$  $\pi$  interactions of C9–H9B $\cdots$ Cg6<sup>i</sup> the centroid of the aromatic ring are shown as a light green dummy atom and the ring along with the H $\cdots$  $\pi$  distance are marked by green line. Symmetry codes: [i] x, 1/2–y, 1/2+z.

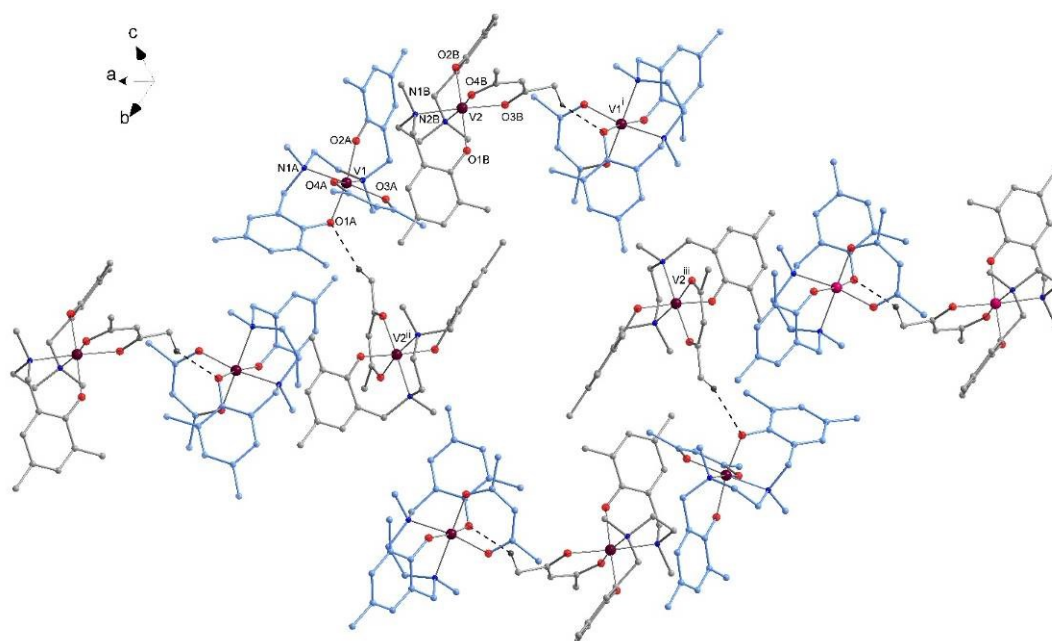

**Figure S2.** Packing diagram for **2**. H atoms engaged in the intermolecular hydrogen bond interactions are marked. The remaining hydrogen atoms and molecules of acetonitrile have been

removed from the drawing for clarity. Symmetry codes: [i]  $1/2-x, 1/2+y, 1/2-z$ ; [ii]  $1/2-x, -1/2+y, 1/2-z$ ; [iii]  $-1/2+x, 1/2-y, -1/2+z$ .

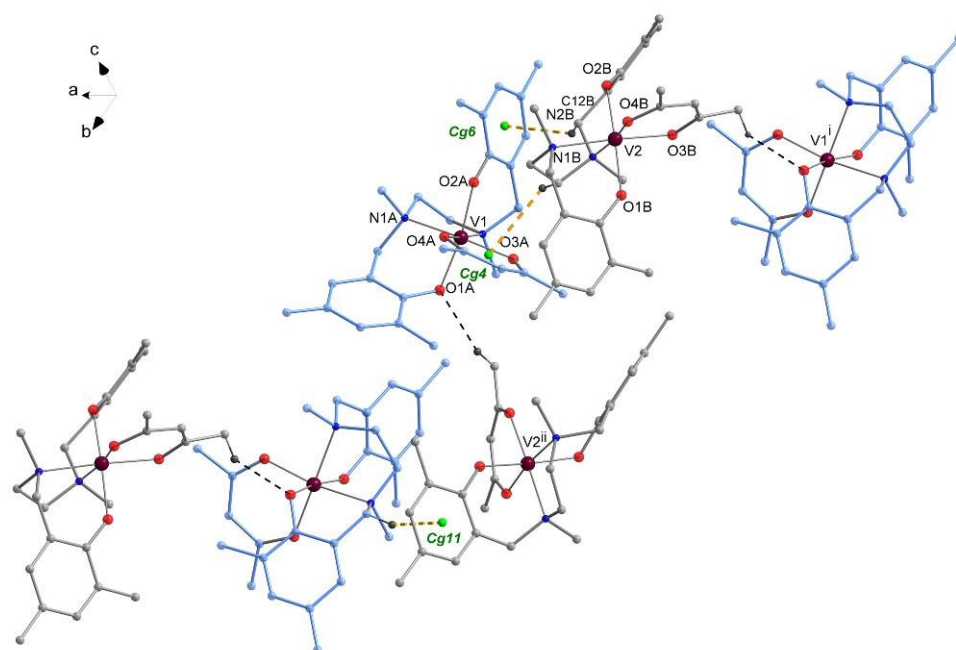

**Figure S3.** Fragment of packing diagram for **2** showing the C–H $\cdots\pi$  intermolecular interactions (marked by yellow dashed line; centroids of aromatic rings are shown as light-green dummy atoms). H atoms engaged in the intermolecular hydrogen bond interactions are marked. The remaining hydrogen atoms and molecules of acetonitrile have been removed from the drawing for clarity. Symmetry codes: [i]  $1/2-x, 1/2+y, 1/2-z$ ; [ii]  $1/2-x, -1/2+y, 1/2-z$ ; [iii]  $-1/2+x, 1/2-y, -1/2+z$ .

**Table S4.** Geometry of the intermolecular hydrogen bonds in **2**.

| D–H $\cdots$ A                       | D–H (Å) | H $\cdots$ A (Å) | D $\cdots$ A (Å) | $\angle$ (D–H $\cdots$ A) (°) |
|--------------------------------------|---------|------------------|------------------|-------------------------------|
| C23B–H23D $\cdots$ O1A <sup>ii</sup> | 0.98    | 2.48             | 3.350(3)         | 147                           |

Symmetry codes: [ii]  $1/2-x, -1/2+y, 1/2-z$

**Table S5.** Geometry of C–H $\cdots\pi$  interactions in **2**.

| C–H $\cdots\pi$                     | H $\cdots$ Cg (Å) | C $\cdots$ Cg (Å) | $\angle$ (C–H $\cdots$ Cg) (°) |
|-------------------------------------|-------------------|-------------------|--------------------------------|
| C7A–H7A2 $\cdots$ Cg11 <sup>i</sup> | 2.75              | 3.58              | 142                            |
| C2–H2A $\cdots$ Cg12                | 2.60              | 3.35              | 133                            |
| C2–H2C $\cdots$ Cg12 <sup>ii</sup>  | 2.88              | 3.54              | 125                            |
| C10B–H10D $\cdots$ Cg4              | 2.96              | 3.52              | 116                            |
| C12B–H12D $\cdots$ Cg6              | 2.88              | 3.64              | 135                            |

C22A–H22B···Cg4      2.71                      3.56                      145

Symmetry codes: [i] 1+x, y, z; [ii] 1-x, -y, 1-z

Cg4 [V1/O3A/C24A/C25A/C26A/O4A]; Cg6 [C13/C14/C15/C16/C17/C18];  
Cg11 [C1B/C2B/C3B/C4B/C5B/C6B]; Cg12 [C13B/C14B/C15B/C16B/C17B/C18B].

C2 – a C atom of the methyl group from acetonitrile

**Table S6.** Geometry of the intermolecular hydrogen bonds in **1**.

| D–H···A                    | D–H (Å) | H···A (Å) | D···A (Å) | <(D–H···A) (°) |
|----------------------------|---------|-----------|-----------|----------------|
| C24–H24C···O1 <sup>i</sup> | 0.98    | 2.51      | 3.487(2)  | 176            |

Symmetry codes: [i] x, 1/2-y, 1/2+z

**Table S7.** Geometry of C–H··· $\pi$  interactions in **1**.

| C–H··· $\pi$              | H···Cg (Å) | C···Cg (Å) | <(C–H···Cg) (°) |
|---------------------------|------------|------------|-----------------|
| C9–H9B···Cg6 <sup>i</sup> | 2.73       | 3.66       | 157             |

Symmetry codes: [i] x, 1/2-y, 1/2+z

Cg6 [C13/C14/C15/C16/C17/C18]

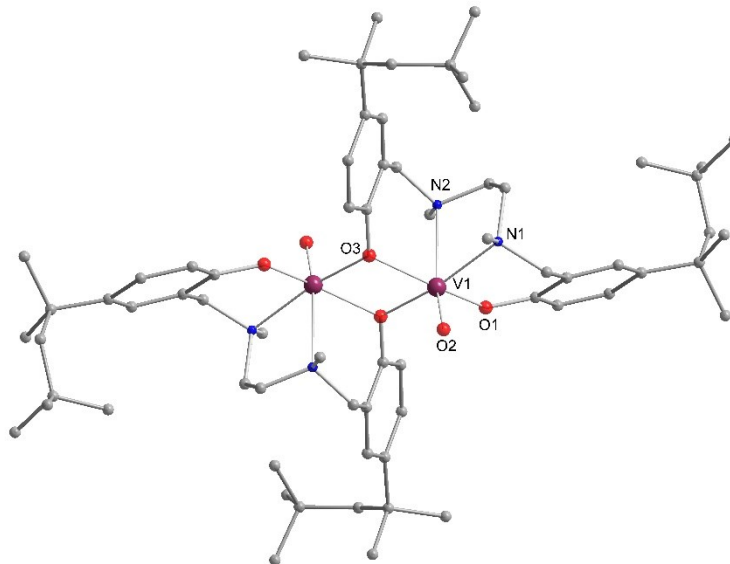

**Figure S4.** The molecular structure of **3** with crystallographic numbering of the donor atoms. Only the higher occupation component of the disordered part was depicted. H atoms have been omitted for clarity.

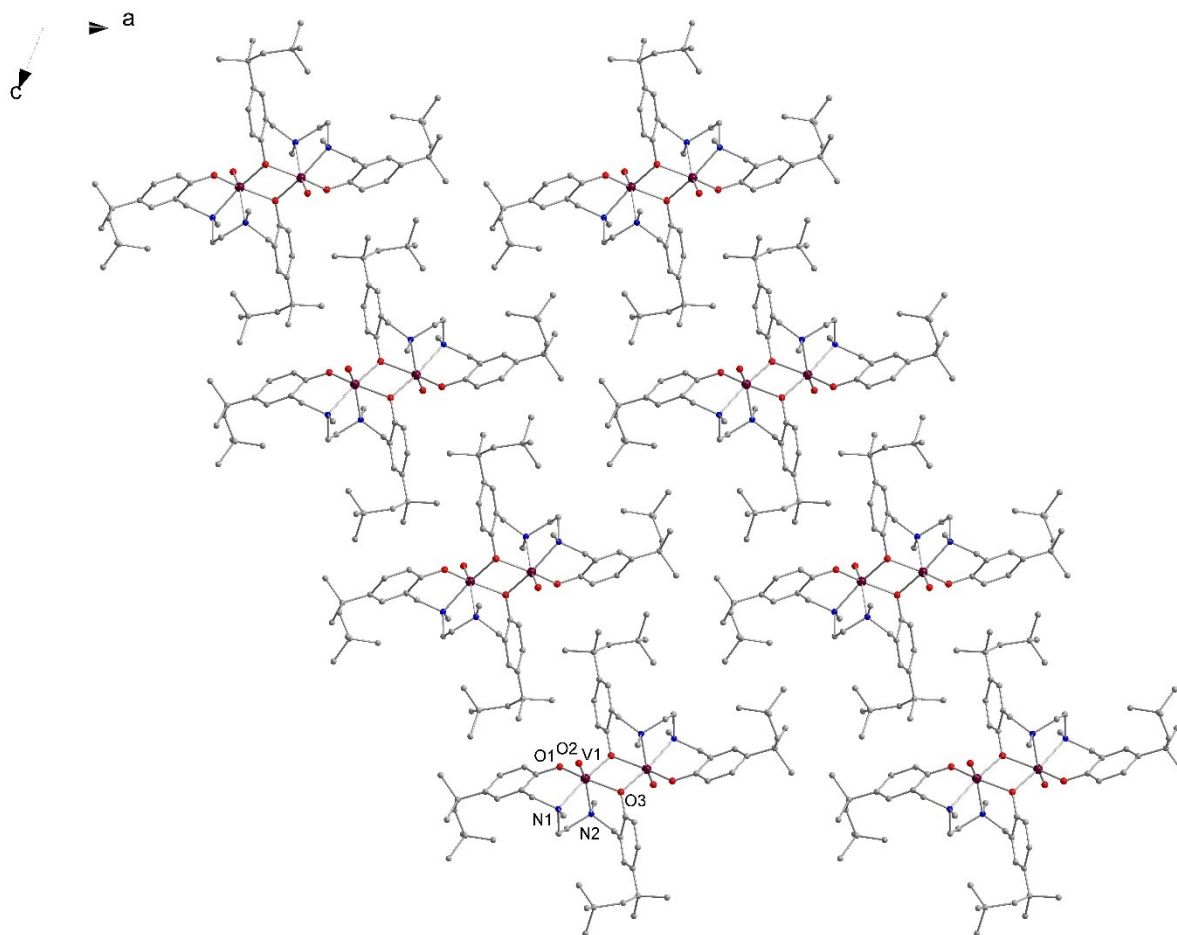

**Figure S5.** Arrangement of molecules **3** viewed down [010] direction. Only the higher occupation component of the disordered part was depicted. H atoms have been omitted for clarity.

**Table S8.** Geometry of C–H $\cdots$  $\pi$  interactions in **3**.

| C–H $\cdots$ $\pi$                  | H $\cdots$ Cg (Å) | C $\cdots$ Cg (Å) | <(C–H $\cdots$ Cg) (°) |
|-------------------------------------|-------------------|-------------------|------------------------|
| C8–H8C $\cdots$ Cg4                 | 2.83              | 3.75              | 158                    |
| C11–H11B $\cdots$ Cg1               | 2.98              | 3.33              | 102                    |
| C11 <sup>i</sup> –H11B $\cdots$ Cg1 | 2.98              | 3.33              | 102                    |

Symmetry codes: [i] 1-x, 1-y, 1-z

Cg1 [V1/O3/V1<sup>i</sup>/O3<sup>i</sup>]; Cg4 [C13/C14/C15/C16/C17/C18]

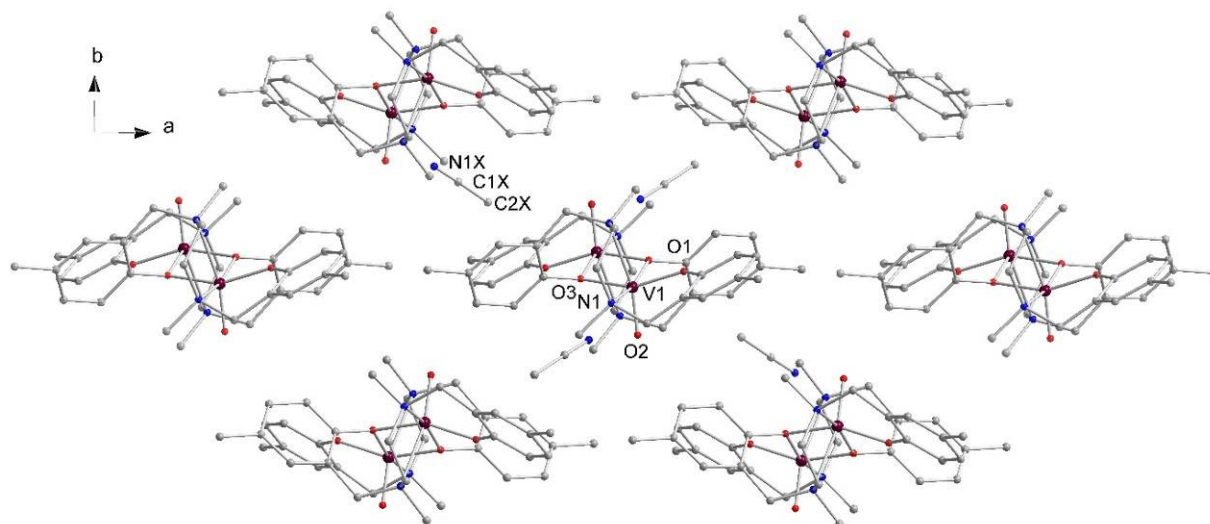

**Figure S6.** Packing diagram presenting selected molecules of  $4 \cdot 2\text{CH}_3\text{CN}$  arranged in layers parallel to the (010) plane. Molecules of  $\text{CH}_3\text{CN}$  are located between layers. H atoms have been omitted for clarity.

**Table S9.** Geometry of C–H $\cdots\pi$  interactions in **4**.

| C–H $\cdots\pi$                    | H $\cdots$ Cg (Å) | C $\cdots$ Cg (Å) | <(C–H $\cdots$ Cg) (°) |
|------------------------------------|-------------------|-------------------|------------------------|
| C8–H8C $\cdots$ Cg4                | 2.66              | 3.61              | 162                    |
| C11–H11B $\cdots$ Cg1              | 2.97              | 3.31              | 102                    |
| C11–H11B $\cdots$ Cg1 <sup>i</sup> | 2.97              | 3.31              | 102                    |
| C2X–H22A $\cdots$ Cg4              | 2.73              | 3.51              | 137                    |

Symmetry codes: [i] 1-x, 1-y, 1-z

Cg1 [V1/O3/V1<sup>i</sup>/O3<sup>i</sup>]; Cg4 [C13/C14/C15/C16/C17/C18]

**Table S10.** Geometry of intermolecular hydrogen bonds in **4**.

|                     | D–H (Å) | H $\cdots$ A (Å) | D $\cdots$ A (Å) | <(D–H $\cdots$ A) (°) |
|---------------------|---------|------------------|------------------|-----------------------|
| C7–H7A $\cdots$ N1X | 0.99    | 2.60             | 3.519(3)         | 155                   |

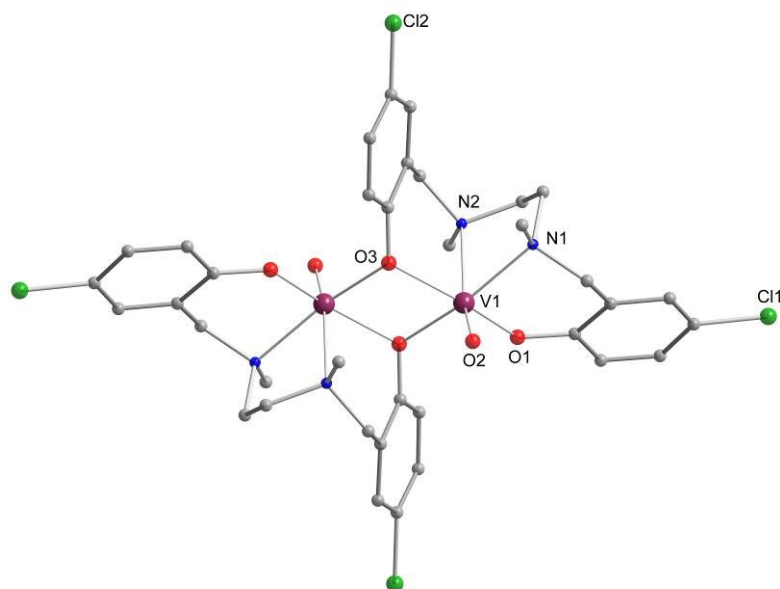

**Figure S7.** The molecular structure of  $5 \cdot 2\text{CH}_3\text{CN}$  with crystallographic numbering of the donor atoms. Hydrogen atoms and  $\text{CH}_3\text{CN}$  molecules are omitted for clarity.

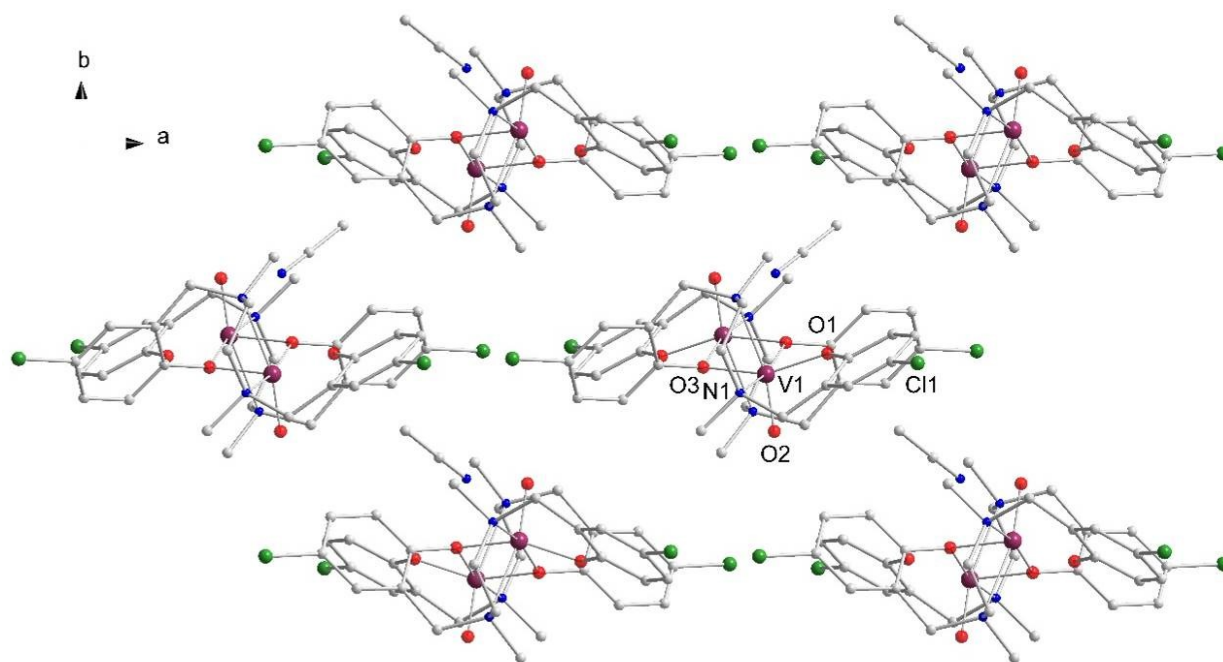

**Figure S8.** Arrangement of molecules  $5 \cdot 2\text{CH}_3\text{CN}$  viewed down  $[001]$  direction. H atoms have been omitted for clarity.

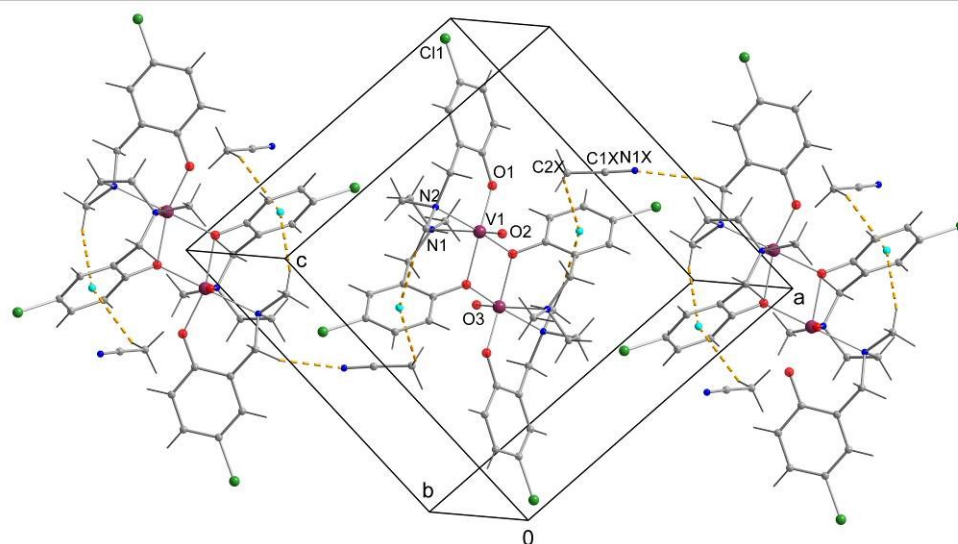

**Figure S9.** A chain of molecules in **5** held together by C–H $\cdots$  $\pi$  interactions (C2 $x$ –H2B $\cdots$ Cg6 $^i$  and C8–H8C $\cdots$ Cg6,  $i = 1-x, 1-y, 1-z$  and hydrogen bond (C7–H7A $\cdots$ N1X $^{ii}$ ,  $ii = -1/2+x, 1/2-y, 1/2+z$ ) (marked by yellow dashed line). The centroids are shown as blue balls.

**Table S11.** Geometry of C–H $\cdots$  $\pi$  interactions in **5**.

| C–H $\cdots$ $\pi$         | H $\cdots$ Cg (Å) | C $\cdots$ Cg (Å) | $\angle$ (C–H $\cdots$ Cg) (°) |
|----------------------------|-------------------|-------------------|--------------------------------|
| C2X–H2B $\cdots$ Cg6 $^i$  | 2.68              | 3.47              | 138                            |
| C8–H8C $\cdots$ Cg6        | 2.63              | 3.57              | 162                            |
| C11–H11B $\cdots$ Cg1      | 2.97              | 3.31              | 101                            |
| C11–H11B $\cdots$ Cg1 $^i$ | 2.97              | 3.51              | 101                            |

Symmetry codes: [i] 1-x, 1-y, 1-z

Cg1 [V1/O3/V1 $^i$ /O3 $^i$ ]; Cg6 [C13/C14/C15/C16/C17/C18]

**Table S12.** Geometry of intermolecular hydrogen bonds in **5**.

|                             | D–H (Å) | H $\cdots$ A (Å) | D $\cdots$ A (Å) | $\angle$ (D–H $\cdots$ A) (°) |
|-----------------------------|---------|------------------|------------------|-------------------------------|
| C7–H7A $\cdots$ N1X $^{ii}$ | 0.99    | 2.53             | 3.456(3)         | 155                           |

Symmetry codes: [ii] -1/2+x, 1/2-y, 1/2+z

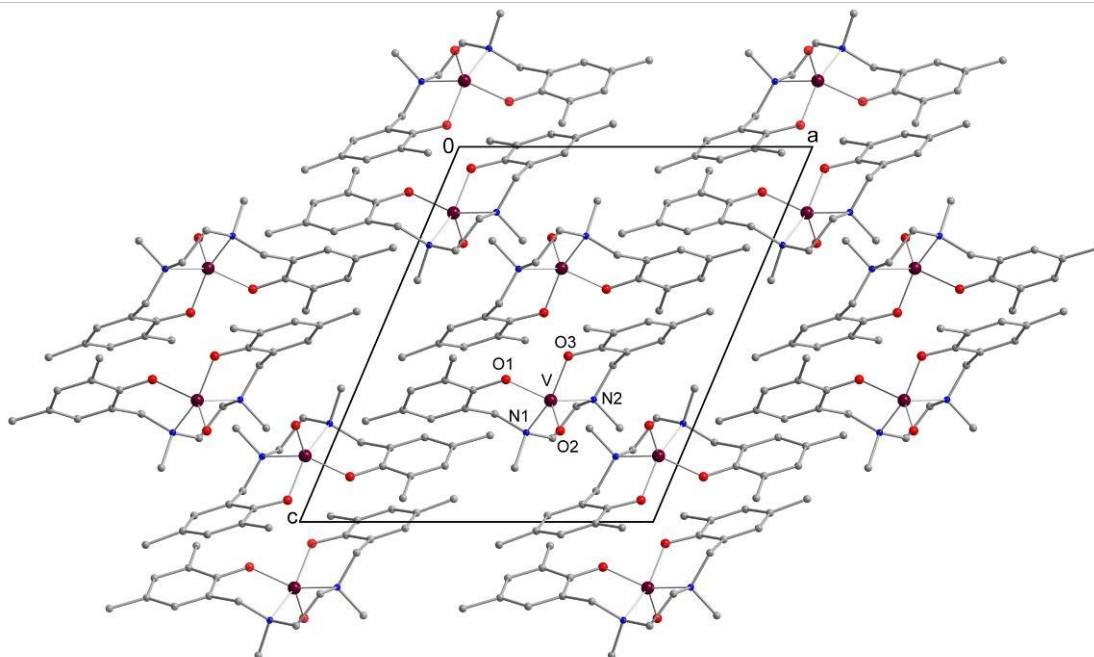

**Figure S10.** Packing diagram in **6** viewed down the  $[010]$  direction. H atoms have been omitted for clarity.

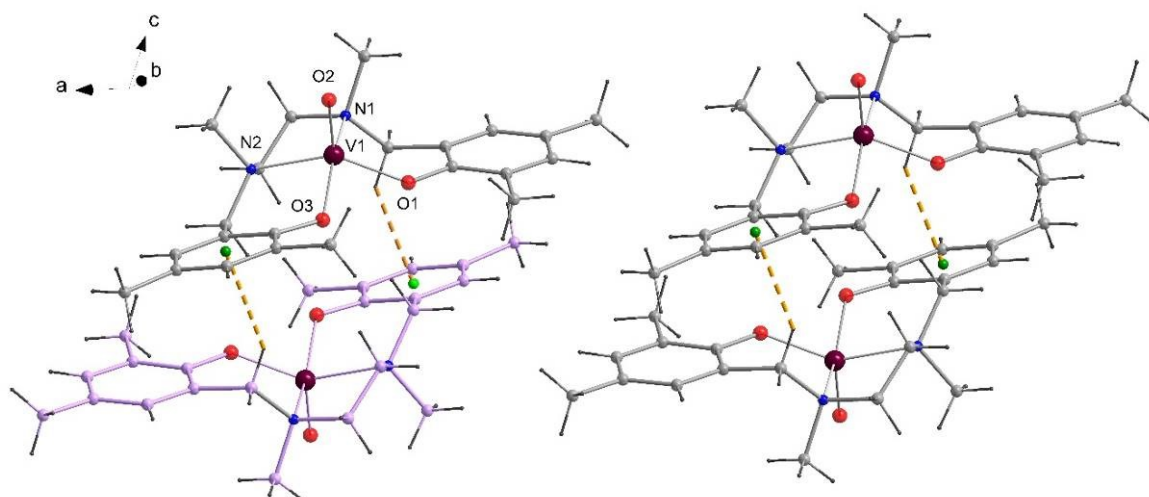

**Figure S11.** C–H $\cdots\pi$  interactions in **6** (marked by yellow dashed line). Centroids are shown as green balls.

**Table S13.** Geometry of C–H $\cdots\pi$  interactions in **6**.

| C–H $\cdots\pi$                   | H $\cdots$ Cg (Å) | C $\cdots$ Cg (Å) | $\angle$ (C–H $\cdots$ Cg) (°) |
|-----------------------------------|-------------------|-------------------|--------------------------------|
| C7–H7B $\cdots$ Cg5 <sup>i</sup>  | 2.63              | 3.44              | 139                            |
| Symmetry codes: [i] 1-x, 1-y, 1-z |                   |                   |                                |
| Cg5 [C13/C14/C15/C16/C17/C18]     |                   |                   |                                |

**Table S14.** Geometry of  $\pi\cdots\pi$  interactions in **6**.

| C–H $\cdots\pi$               | Cg $\cdots$ Cg (Å) | <(Gamma) (°) |
|-------------------------------|--------------------|--------------|
| Cg4 $\cdots$ Cg5 <sup>i</sup> | 4.28               | 44           |
| Cg5 $\cdots$ Cg4 <sup>i</sup> | 4.28               | 33           |

Symmetry code: [i] 1-x, 1-y, 1-z

Cg4 [C1/C2/C3/C4/C5/C6]; Cg5 [C13/C14/C15/C16/C17/C18];

<(Gamma) = 44° is the angle formed between the vector connecting centers of the rings Cg(4) $\cdots$ Cg(5)<sup>i</sup> and normal to the plane of Cg5

<(Gamma) = 33° is the angle formed between the vector connecting centers of the rings Cg(5) $\cdots$ Cg(4)<sup>i</sup> and normal to the plane of Cg4

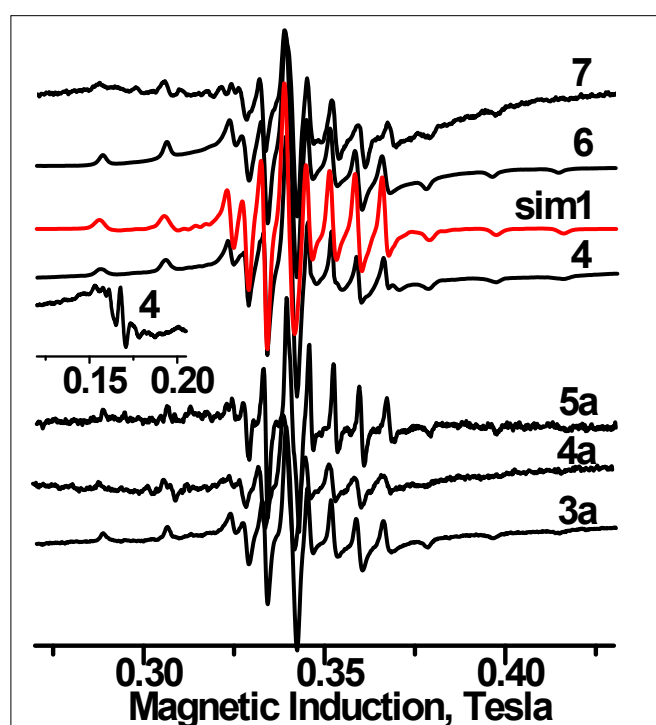

Figure S12. Frozen solution EPR spectra (at 77 K) of compounds **3–7** (**4** in CH<sub>2</sub>Cl<sub>2</sub>, **3a–5a** correspond to **3–5** in CH<sub>3</sub>CN; **6** and **7** in CH<sub>2</sub>Cl<sub>2</sub>) together with the theoretical spectrum **sim1**, calculated by using the parameters given in the text.

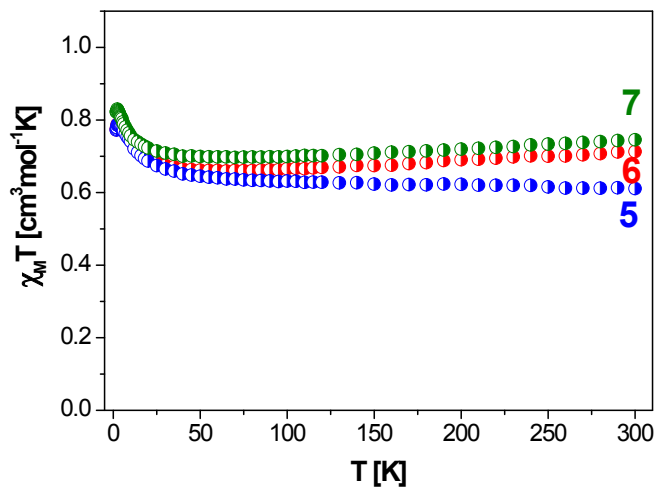

**Figure S13.** The  $\chi_M T$  vs  $T$  product after subtracting TIP from the experimental data for **3–5**.

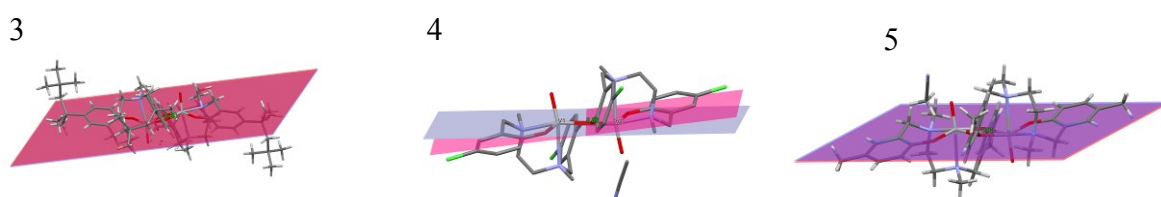

**Figure S14.** Dihedral angle between the two  $V_2O_2$  planes for **3–5**.

**Table S15.** Magnetic and structural parameters for binuclear octahedral oxidovanadium(IV) compounds.

| Compound                                                                          | $J/\text{cm}^{-1}$ ( $T/K$ ) | $V \cdots V$<br>/Å | $V-O-V/^\circ$ | $\tau/^\circ$ | Ref.      |
|-----------------------------------------------------------------------------------|------------------------------|--------------------|----------------|---------------|-----------|
| $[\text{Et}_3\text{NH}]_2[(\text{VO})_2\text{L}] \cdot 4\text{CH}_2\text{Cl}_2^a$ | −167.9                       | 3.125              | 98.6           | $180^b$       | 24a       |
| $[(\text{VO})_2(\text{L}^2)(\text{OCH}_3)(\text{DMSO})]^c$                        | −244 <sup>d</sup>            | 3.026              | 94.3, 101.8    | $131.1^b$     | 24b       |
| $[(\text{VO})_2(\text{L}^3)(\text{OH})_2]\text{I}_2 \cdot 4\text{H}_2\text{O}^e$  | −300 <sup>d</sup>            | 2.965              | 98.1           | $175.7^b$     | 24c       |
| $[(\text{VO})_2(\text{L}^4)(\text{OH})_2]\text{Br}_2^f$                           | −354 <sup>d</sup>            | 3.033              | 101.2          | $180^b$       | 24d       |
| <b>5</b>                                                                          | +0.40                        | 3.243              | 106.9          | 180           | This work |
| <b>6</b>                                                                          | +5.34                        | 3.249              | 106.5          | 174.1         | This work |
| <b>7</b>                                                                          | +3.22                        | 3.254              | 106.1          | 180           | This work |
| $[(\text{VO})_2(\text{HL}^5)_2]^g$                                                | +3.1                         | —                  | 107.0          | $0.0^b$       | 2c        |

${}^a\text{H}_3\text{L}^1 = (N,N\text{-bis}(2\text{-hydroxybenzyl})\text{aminoacetic acid})$ ,  ${}^b\text{Ref. 24a}$ ,

${}^c\text{L}^2 = 2,6\text{-bis}(\text{salicylideneaminomethyl})\text{-4-methylphenol}$ ,  ${}^dJ$  converted to the convention  $-JS_1S_2$  used in this paper.

${}^e\text{L}^3 = N,N,N,N\text{-tetrakis}(2\text{-pyridylmethyl})\text{-ethylenediamine}$ ,  ${}^f\text{L}^4 = 1,4,7\text{-triazacyclononane}$ ,

${}^g\text{H}_3\text{L}^5 = N\text{-salicylidene-2-[bis}(2\text{-hydroxyethyl})\text{amino}]ethylamine$ .

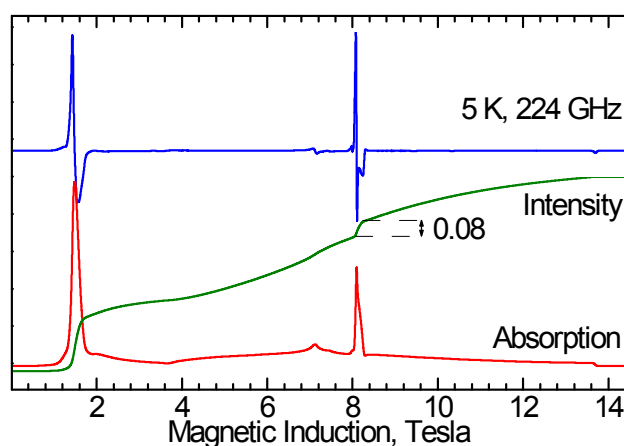

**Figure S15.** Blue: HFEPR spectrum of **1**. Red: integrated spectrum - absorption. Green: integrated absorption – intensity. The V(IV) contamination contributes 8% of the total EPR intensity (the vertical range of the intensity plot is 0 to 1).

### Monomeric V(III) and V(IV) Compounds.

Magnetic properties for polycrystalline samples of monomeric non-oxidovanadium(III) **1**, **2** and oxidovanadium(IV) **6**, **7** are presented in Figure S16 –S18.

Compounds **1** and **2** exhibit large zero-field splitting. To take this into account, the magnetic susceptibility may be calculated from the fundamental formula

$$\chi_{V(III)} = -\frac{N \sum_i \frac{\partial E_i}{\partial B} e^{-\frac{E_i}{kT}}}{B \sum_i e^{-\frac{E_i}{kT}}} + TIP \quad (S1)$$

The three energies  $E_i$  of the triplet state were determined by diagonalizing the matrix of the spin-Hamiltonian. The  $\partial E_i / \partial B$  derivatives were calculated numerically, by evaluating energies  $E_i$  5 Gauss below and 5 Gauss above the magnetic field of the the SQUID instrument (5000 G). Formula (S1) gives the magnetic susceptibility  $\chi$  at an orientation ( $\Theta, \Phi$ ) of a molecule versus the magnetic field and needs still to be averaged over all orientations, which is accomplished by numerical integration of  $\chi(\Theta, \Phi) \sin \Theta d\Theta d\Phi$ , in similar way as powder EPR spectra are calculated. Both V(III) complexes contain substantial V(IV) contamination seen in EPR (Figure S15) whose magnetic susceptibility was expressed as

$$\chi_{V(IV)} = \frac{N \mu_B^2 g^2}{3kT} \frac{3}{4} \quad (S2)$$

The equation for total susceptibility was

$$\chi = (1 - x) \chi_{V(III)} + x \chi_{V(IV)} \quad (S3)$$

where x is the fraction of the V(IV) contamination.

Finally, the effect of the intermolecular interactions was taken into account by converting the susceptibility above to

$$\chi' = \frac{\chi}{1 - \frac{2zJ\chi}{N \mu_B^2 g^2}} \quad (S4)$$

The  $g$ ,  $D$  and  $E$  parameters were not fitted, they were fixed at values found from EPR. Only the fraction of the V(IV) impurities,  $zJ$  and  $TIP$  were allowed to vary. The results are presented in Figures S16 and S17.

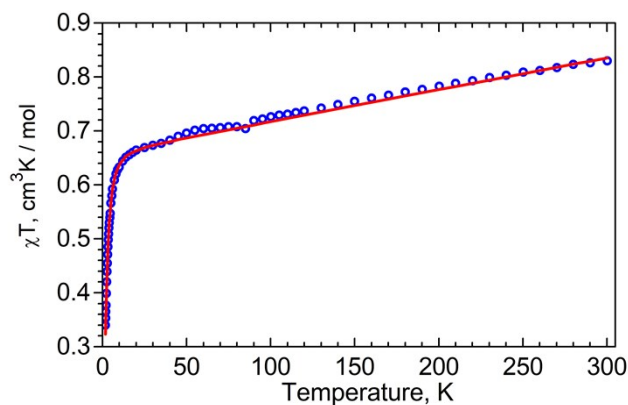

**Figure S16.** Magnetic data for **1**. Blue:experimental points. Red: calculated using  $g_{\text{ave}}=1.94$ ,  $D=5.29 \text{ cm}^{-1}$ ,  $E=1.68 \text{ cm}^{-1}$ , 30% of the V(IV) impurity,  $zJ=0.0085 \text{ cm}^{-1}$ ,  $TIP=588 \cdot 10^{-6} \text{ cm}^3\text{mol}^{-1}$ .  $D$  and  $E$  are the EPR values (see Figure 7, main text).

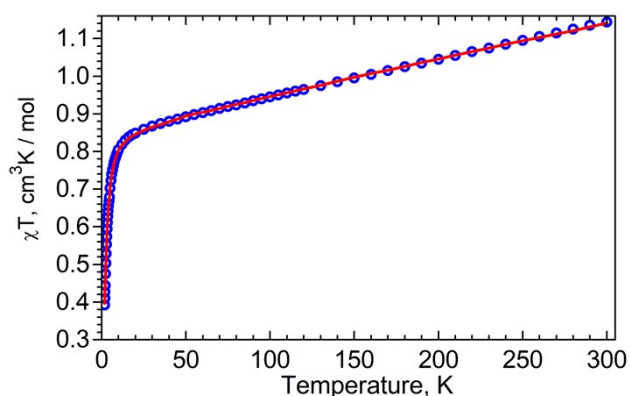

**Figure S17.** Magnetic data for **2**. Blue:experimental points. Red: calculated using  $g_{\text{ave}} = 1.93$ ,  $D = 5.26 \text{ cm}^{-1}$ ,  $E = 1.67 \text{ cm}^{-1}$ , 8.9 % of the V(IV) impurity,  $zJ' = -0.14 \text{ cm}^{-1}$ ,  $TIP=990 \cdot 10^{-6} \text{ cm}^3\text{mol}^{-1}$ .  $D$  and  $E$  are the EPR values averaged for two species (see Figure 8, main text).

The simulation of magnetic data of **6** and **7**, shown in Figure S18, was carried out using the PHI program, taking into account the exchange  $zJ'$  and the TIP parameter. The fitting leads to the following results:  $g = 1.94$  and  $zJ' = -0.01 \text{ cm}^{-1}$ ,  $TIP = 598 \cdot 10^{-6}$  for **6** and  $g = 1.97$  and  $zJ' = -0.08 \text{ cm}^{-1}$ ,  $TIP = 441 \cdot 10^{-6}$  for **7**. Also as in case of **6** and **7**, very weak antiferromagnetic interaction in

the crystal lattice exist, in agreement with the X-ray studies (Figure S10 and S11; Table S13 and S14.)

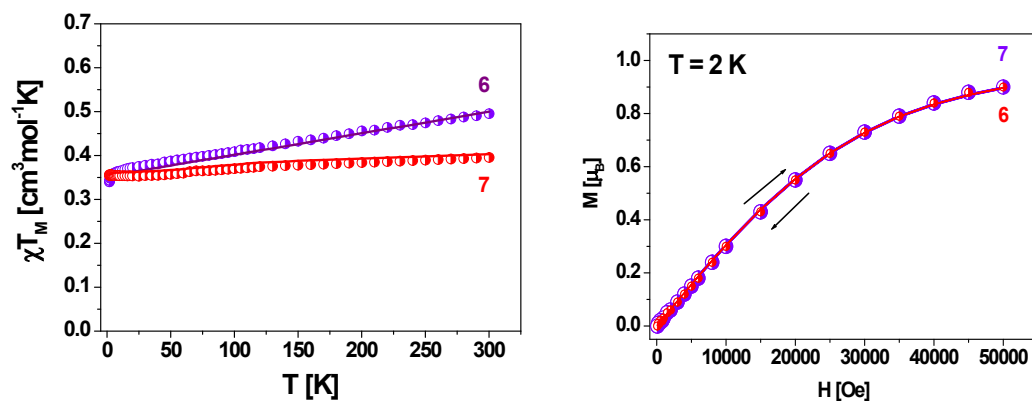

**Figure S18.** DC magnetic data for **6**, **7**. Left – (●)  $\chi_M T$  and (○)  $\chi_M$ . Right – field dependence of the magnetization per formula unit. The solid lines are calculated using the PHI program.
